# Supplementary material
Source: PubMed Central journal article supplement (PMC2673263)
Supplement: M809802200_1.pdf [file M809802200_1.pdf]

**ONLINE SUPPLEMENTARY DATA (*Yau et al*)**

**Supplementary table-1:** Primers used for sub-cloning human Angptl4-CCD and mutagenesis.

| Primer     | Oligonucleotide sequence                     |
|------------|----------------------------------------------|
| hA4-F-SalI | 5'-TGAGGCGTCGACGGGACCCGTGCAGTCCAA-3'         |
| hA4-R-XhoI | 5'-TGAGGCCTCGAGCTATTCGCGCAGCCCCTG-3'         |
| hA4-F-StyI | 5'-TGAGGCGTCGACGGGACCCGTGCAGTCCAA-3'         |
| H46A-F     | 5'-ATGAATGTCCTGGCGGCAGGACTCCTGCAGCTC-3'      |
| H46A-R     | 5'-GAGCTGCAGGAGTCCTGCCGCCAGGACATTCAT-3'      |
| Q50A-F     | 5'-GCGCACGGACTCCTGGCACTCGGCCAGGGGCTG-3'      |
| Q50A-R     | 5'-CAGCCCCTGGCCGAGTGCCAGGAGTCCGTGCGC-3'      |
| Q53A-F     | 5'-CTCCTGCAGCTCGGCGCAGGGCTGCGCGAACAC-3'      |
| Q53A-R     | 5'-GTGTTTCGCGCAGCCCTGCGCCGAGCTGCAGGAG-3'     |
| 465053A-F  | 5'-CTGGCGGCAGGACTCCTGGCACTCGGCGCAGGGCTG-3'   |
| 465053A-R  | 5'-CAGCCCCTGCGCCGAGTGCCAGGAGTCCCTGCCGCCAG-3' |

**Supplementary Figure-1: Primary amino acid sequence analysis and secondary structural prediction for the NH<sub>2</sub>-terminal CCD of Angptl4.** **A:** multiple alignments of the amino acid sequences of CCD from all known Angptl3 and Angptl4 derived from different species. The alignments were generated by CLUSTAL W version 1.86 with default parameters. The amino acid sequences were aligned with their NH<sub>2</sub>-terminal signal peptides omitted. The highly conserved 12-amino acid motif is underlined. \* identical;  $\frac{2}{3}$  high similarity;  $\frac{1}{3}$  low similarity. The secondary structural prediction of hAngptl4-CCD was performed by using PSIPRED. Confidence of prediction (Conf) is shown on top (1-low; 9-high). Predicted structure (Pred) is annotated as “C” for free coil and “H” for  $\alpha$ -helix. The diagrammatic annotation is shown above the sequence with strings as free coils and gray bars as  $\alpha$ -helices. **B.** Helical-wheel plot showing the relative orientations of each repeat position in the Helix-1 at periodicity of “7/2” (i.e. 7 amino acid residues per 2 turns). The hydrophilic amino acid residues located on the solvent-exposed-faces are represented in red circles, while those hydrophobic residues on the lipid-exposed face are shown in green. The amino acid residues corresponding to the conserved motif are stripped with the three labeled polar residues located on the solvent-exposed face.



## Supplementary Figure-2 (*Yau et al*)

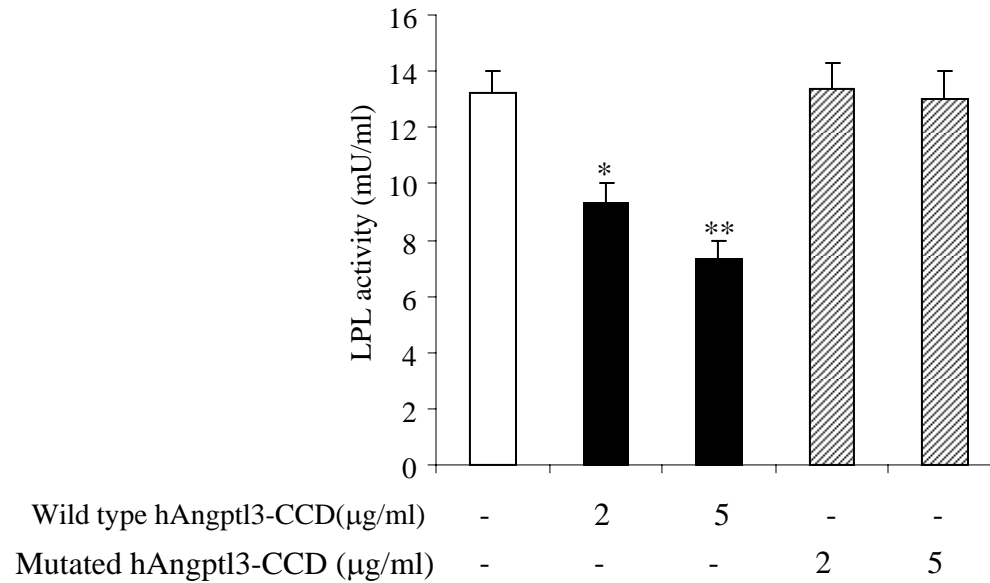

**Supplementary Figure-2:** The three polar amino acid residues within the coiled-coil domain are critical for the LPL inhibitory activity of Angptl3. Bovine LPL activities were measured as in Figure 1B, in the presence of different concentrations of wild type hAngptl3-CCD or mutated hAngptl3-CCD in which the three polar amino acid residues within the conserved motif were replaced by alanine. Open bar: control group; Black bar: wild type hAngptl3-CCD-treated groups; Hatched bar: mutated hAngptl3-CCD treated groups. \*,  $p < 0.05$ ; \*\*,  $p < 0.01$  versus control group or mutated hAngptl3-CCD treated groups ( $n = 4-6$ ).
